# Supplementary material
Source: publisher figshare collection journal article supplement (https://springernature.figshare.com/ndownloader/files/17416940)
Supplement: Supplementary file [file 17416940]

**Table 5** Supplementary Perceived Behavioral Control: individual items

|                                                                                                  | Strength | Aerobic | Flexibility |
|--------------------------------------------------------------------------------------------------|----------|---------|-------------|
| <i>It is easy to provide exercise prescriptions for pALS.</i>                                    |          |         |             |
| Physicians                                                                                       | 4.0±1.9  | 4.8±1.9 | 4.8±1.5     |
| HP_Yes                                                                                           | 4.4±1.7  | 4.3±1.6 | 5.6±1.3     |
| <i>I am confident in providing exercise counsel to pALS</i>                                      |          |         |             |
| Physicians                                                                                       | 4.8±1.7  | 5.0±1.5 | 5.4±1.5     |
| HP_Yes                                                                                           | 4.9±1.6  | 5.2±1.6 | 5.5±1.9     |
| <i>My clinic accommodates exercise advise for pALS (i.e. has the facility, space, equipment)</i> |          |         |             |
| Physicians                                                                                       | 3.0±2.1  | 2.9±2.2 | 3.6±2.5     |
| HP_Yes                                                                                           | 3.8±2.1  | 4.0±2.0 | 4.3±2.1     |
| <i>My clinic encourages exercise counsel for pALS</i>                                            |          |         |             |
| Physicians                                                                                       | 4.4±2.0  | 4.8±1.8 | 5.9±1.1     |
| HP_Yes                                                                                           | 4.9±1.8  | 5.2±1.7 | 5.9±1.5     |
